# Supplementary material for: The 3-Month Effectiveness of a Stratified Blended Physiotherapy Intervention in Patients With Nonspecific Low Back Pain: Cluster Randomized Controlled Trial
Source: PubMed Central journal article supplement (PMC8917429; doi:10.2196/31675), 2022-02-25

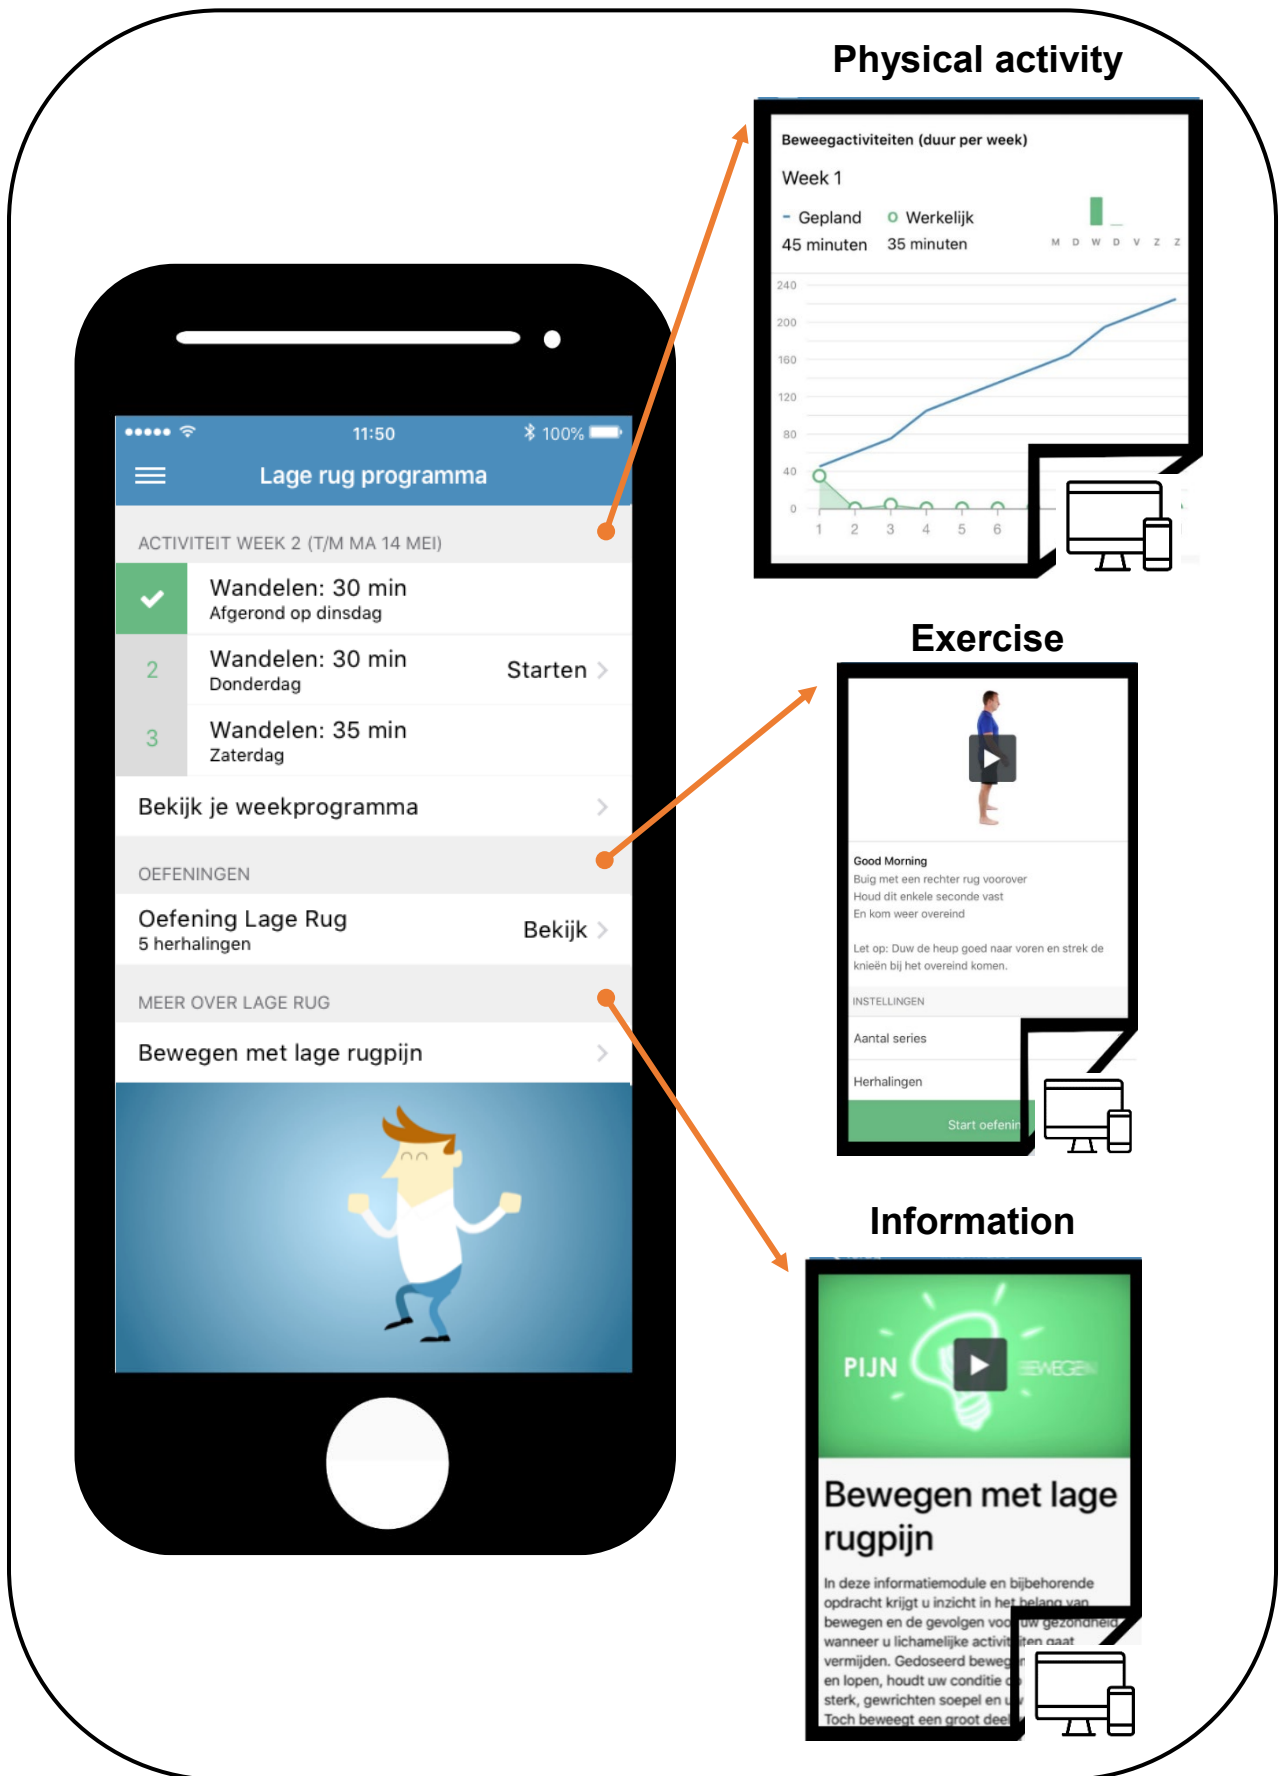

Supplement: jmir_v24i2e31675_app2.pdf [file jmir_v24i2e31675_app2.pdf]
